# Supplementary material for: Mechanistic Approach on Melatonin-Induced Hormesis of Photosystem II Function in the Medicinal Plant Mentha spicata
Source: MDPI journal article supplement (doi:10.3390/plants12234025), 2023-11-29
Supplement: s1 [file s1]

# Mechanistic Approach on Melatonin Induced Hormesis of Photosystem II Function in the Medicinal Plant *Mentha spicata*

Michael Moustakas, Ilektra Sperdouli, Ioannis-Dimosthenis S. Adamakis, Begüm Şaş, Sumrunaz İşgören, Julietta Moustaka and Fermín Morales

**Table S1.** Definitions of the chlorophyll fluorescence parameters used in the experiments

| Parameter     | Definition                                                                                                                                                                                                  | Calculation                                                                                                                                                                    |
|---------------|-------------------------------------------------------------------------------------------------------------------------------------------------------------------------------------------------------------|--------------------------------------------------------------------------------------------------------------------------------------------------------------------------------|
| $Fv/Fm$       | Maximum efficiency of PSII photochemistry                                                                                                                                                                   | $(Fm - F_0)/Fm$                                                                                                                                                                |
| $\Phi_{PSII}$ | Effective quantum yield of PSII photochemistry                                                                                                                                                              | $(Fm' - F_s)/Fm'$                                                                                                                                                              |
| $\Phi_{NPQ}$  | Quantum yield of regulated non-photochemical energy loss in PSII                                                                                                                                            | $F_s/Fm' - F_s/Fm$                                                                                                                                                             |
| $\Phi_{NO}$   | Quantum yield of nonregulated energy loss in PSII                                                                                                                                                           | $F_s/Fm$                                                                                                                                                                       |
| $Fv'/Fm'$     | Efficiency of open PSII reaction centers                                                                                                                                                                    | $(Fm' - F_0')/Fm'$                                                                                                                                                             |
| $Fv/F_0$      | Efficiency of the oxygen evolving complex (OEC) on the donor side of PSII                                                                                                                                   | $(Fm - F_0)/F_0$                                                                                                                                                               |
| ETR           | Electron transport rate                                                                                                                                                                                     | $\Phi_{PSII} \times PAR \times c \times abs$ , where PAR is the photosynthetically active radiation, c is 0.5, and abs is the total light absorption of the leaf taken as 0.84 |
| $qp$          | Photochemical quenching, representing the redox state of quinone A ( $Q_A$ ), or in other words the fraction of PSII reaction centers in open state based on the “puddle” model for the photosynthetic unit | $(Fm' - F_s)/(Fm' - F_0')$                                                                                                                                                     |
| NPQ           | Non-photochemical quenching reflecting the dissipation of excitation energy as heat                                                                                                                         | $(Fm - Fm')/Fm'$                                                                                                                                                               |
| EXC           | Excess excitation energy                                                                                                                                                                                    | $(Fv/Fm - \Phi_{PSII})/Fv/Fm$                                                                                                                                                  |
| 1-qL          | The fraction of closed PSII reaction centres based on a lake model for the photosynthetic unit                                                                                                              | $1 - (q_p \times F_0'/F_s)$                                                                                                                                                    |
